# Supplementary material
Source: PubMed Central journal article supplement (PMC8035974)
Supplement: NIHMS1668589-supplement-Supplemental_Publication_Material.pdf [file NIHMS1668589-supplement-Supplemental_Publication_Material.pdf]

## **SUPPLEMENTAL MATERIAL**

## SUPPLEMENTAL METHODS

Missingness for hospital characteristics is described in Table I. Several methods for imputing missing values were conducted, including no imputation (allowing missing values), univariate imputation, and multivariate imputation. Analytic datasets resulting from each of these methods were tested in the main specification, with no differences between the outputs. Multivariate imputation was used for the final analysis dataset. Ten values were imputed for each missing variable using a multivariate imputation method, as the mean of ten multivariate imputed values obtained from the iterative Markov Monte Carlo method with the *mi impute mvn* feature in Stata (StataCorp, College Station, TX, USA). The mean of those ten values was used to replace the missing values.

**Table I. Hospital Characteristics Missingness**

| Covariate                        | Source Dataset | Patient-Level<br>Frequency<br>N=76,695 | Patient-Level<br>Percent<br>Missingness | Hospital-Level<br>Frequency<br>N=3,399 | Hospital-Level<br>Percent<br>Missingness |
|----------------------------------|----------------|----------------------------------------|-----------------------------------------|----------------------------------------|------------------------------------------|
| % uninsured by HRR               | AHRF           | 574                                    | 0.77                                    | 141                                    | 4.15                                     |
| % Medicare Advantage Penetration | HCRIS          | 588                                    | 0.75                                    | 147                                    | 4.32                                     |
| Part of a hospital system        | AHA Survey     | 280                                    | 0.37                                    | 92                                     | 2.71                                     |
| Rural hospital                   | HCRIS          | 200                                    | 0.21                                    | 140                                    | 4.12                                     |
| % hospital Medicare discharges   | AHRF           | 158                                    | 0.19                                    | 130                                    | 3.82                                     |
| Ownership type                   | HCRIS          | 145                                    | 0.19                                    | 121                                    | 3.56                                     |
| Specialty hospital               | HCRIS          | 145                                    | 0.19                                    | 121                                    | 3.56                                     |
| Teaching hospital                | HCRIS          | 145                                    | 0.19                                    | 121                                    | 3.56                                     |
| Hospital bed count               | HCRIS          | 145                                    | 0.19                                    | 121                                    | 3.56                                     |
| Herfindahl-Hirschman Index       | HCRIS          | 145                                    | 0.19                                    | 121                                    | 3.56                                     |

HRR=Hospital Referral Region; AHRF=Area Health Resources Files; HCRIS=Healthcare Cost Report Information System; AHA=American Hospital Association;

## SUPPLEMENTAL TABLES

**Table II. Additional Analyses: Hospitals Offering a Cardiac Rehabilitation (CR) Program and CR Type of Facility**

| Independent variables                             | Effect Modification                                                                                |                                      |                        |                                                                                                                                                      |                                      |                        | Subgroup Analyses                                                                                                                                     |                                                    |
|---------------------------------------------------|----------------------------------------------------------------------------------------------------|--------------------------------------|------------------------|------------------------------------------------------------------------------------------------------------------------------------------------------|--------------------------------------|------------------------|-------------------------------------------------------------------------------------------------------------------------------------------------------|----------------------------------------------------|
|                                                   | CR Program Offered<br><i>Defined as hospitals with any CR claim anywhere in 5% Medicare sample</i> |                                      |                        | Index Hospitals Matched to CR Programs<br><i>Defined as hospitals where any patients in analytic sample had both an index event &amp; a CR claim</i> |                                      |                        | Facility Type Where CR Performed<br><i>In patients who did CR, non-hospital ambulatory facility vs hospitals &amp; physician offices vs hospitals</i> |                                                    |
|                                                   | AME estimates / (95% CI) / significance                                                            |                                      |                        | AME estimates / (95% CI) / significance                                                                                                              |                                      |                        | AME estimates / (95% CI) / significance                                                                                                               |                                                    |
|                                                   | Yes<br>Obs = 58,249<br>Groups = 1,994                                                              | No<br>Obs = 18,426<br>Groups = 1,909 | Interaction<br>p-value | Yes<br>Obs = 57,870<br>Groups = 1,341                                                                                                                | No<br>Obs = 18,803<br>Groups = 2,057 | Interaction<br>p-value | Non-Hospital Ambulatory<br>Obs = 14,399<br>Groups = 1,611                                                                                             | Physician Office<br>Obs = 13,616<br>Groups = 1,593 |
| Pre-period slope (monthly)                        | 0.001<br>(0.000, 0.002)<br>‡                                                                       | 0.000<br>(-0.001, 0.001)             | NS                     | 0.001<br>(0.000, 0.002)<br>‡                                                                                                                         | 0.000<br>(-0.001, 0.001)             | NS                     | -0.000<br>(-0.001, 0.000)                                                                                                                             | -0.000<br>(-0.001, 0.001)                          |
| Implementation of Payment Increase (level change) | 0.002<br>(-0.013, 0.017)                                                                           | 0.011<br>(-0.009, 0.031)             | NS                     | 0.002<br>(-0.013, 0.017)                                                                                                                             | 0.009<br>(-0.009, 0.026)             | NS                     | 0.007<br>(-0.011, 0.024)                                                                                                                              | 0.005<br>(-0.009, 0.018)                           |
| Post-period slope change (monthly)                | -0.001<br>(-0.003, -0.00)                                                                          | 0.003<br>(-0.002, 0.001)             | NS                     | -0.001<br>(-0.003, -0.000)<br>‡                                                                                                                      | -0.000<br>(-0.002, 0.001)            | NS                     | 0.001<br>(-0.001, 0.002)                                                                                                                              | -0.001<br>(-0.002, 0.000)                          |
| Age in year of event, in decades                  | -0.059<br>(-0.064, -0.054)<br>‡                                                                    | -0.027<br>(-0.032, -0.021)<br>‡      | NA                     | -0.060<br>(-0.065, -0.055)<br>‡                                                                                                                      | -0.021<br>(-0.027, -0.016)<br>‡      | NA                     | -0.001<br>(-0.007, 0.005)                                                                                                                             | 0.002<br>(-0.002, 0.007)                           |
| Female                                            | -0.029<br>(-0.035, -0.022)<br>‡                                                                    | -0.017<br>(-0.025, -0.09)<br>‡       | NA                     | -0.030<br>(-0.037, -0.023)<br>‡                                                                                                                      | -0.012<br>(-0.019, -0.005)<br>‡      | NA                     | -0.004<br>(-0.011, 0.003)                                                                                                                             | -0.002<br>(-0.008, 0.004)                          |
| Race (reference: White)                           |                                                                                                    |                                      |                        |                                                                                                                                                      |                                      |                        |                                                                                                                                                       |                                                    |
| Black                                             | -0.037<br>(-0.052, -0.022)<br>‡                                                                    | -0.065<br>(-0.086, -0.044)<br>‡      | NA                     | -0.040<br>(-0.054, -0.026)<br>‡                                                                                                                      | -0.034<br>(-0.051, -0.027)<br>‡      | NA                     | -0.067<br>(-0.081, -0.053)<br>‡                                                                                                                       | -0.004<br>(-0.015, 0.007)                          |
| Other                                             | -0.052<br>(-0.072, -0.031)<br>‡                                                                    | -0.075<br>(-0.010, -0.052)<br>‡      | NA                     | -0.052<br>(-0.070, -0.033)<br>‡                                                                                                                      | -0.049<br>(-0.060, -0.037)<br>‡      | NA                     | -0.015<br>(-0.039, 0.008)                                                                                                                             | -0.006<br>(-0.024, 0.012)                          |
| Charlson Comorbidity Index in month of event      | -0.016<br>(-0.017, -0.015)<br>‡                                                                    | -0.008<br>(-0.010, -0.006)<br>‡      | NA                     | -0.016<br>(-0.018, -0.015)<br>‡                                                                                                                      | -0.007<br>(-0.008, -0.005)<br>‡      | NA                     | -0.000<br>(-0.001, 0.001)                                                                                                                             | 0.001<br>(-0.000, 0.002)                           |

| Independent variables                                                               | Effect Modification                                                                                                                           |                                      |                        |                                                                                                                                                                                                 |                                      |                        | Subgroup Analyses                                                                                                                                                                                |                                                    |
|-------------------------------------------------------------------------------------|-----------------------------------------------------------------------------------------------------------------------------------------------|--------------------------------------|------------------------|-------------------------------------------------------------------------------------------------------------------------------------------------------------------------------------------------|--------------------------------------|------------------------|--------------------------------------------------------------------------------------------------------------------------------------------------------------------------------------------------|----------------------------------------------------|
|                                                                                     | CR Program Offered<br><i>Defined as hospitals with any CR claim anywhere in 5% Medicare sample</i><br>AME estimates / (95% CI) / significance |                                      |                        | Index Hospitals Matched to CR Programs<br><i>Defined as hospitals where any patients in analytic sample had both an index event &amp; a CR claim</i><br>AME estimates / (95% CI) / significance |                                      |                        | Facility Type Where CR Performed<br><i>In patients who did CR, non-hospital ambulatory facility vs hospitals &amp; physician offices vs hospitals</i><br>AME estimates / (95% CI) / significance |                                                    |
|                                                                                     | Yes<br>Obs = 58,249<br>Groups = 1,994                                                                                                         | No<br>Obs = 18,426<br>Groups = 1,909 | Interaction<br>p-value | Yes<br>Obs = 57,870<br>Groups = 1,341                                                                                                                                                           | No<br>Obs = 18,803<br>Groups = 2,057 | Interaction<br>p-value | Non-Hospital Ambulatory<br>Obs = 14,399<br>Groups = 1,611                                                                                                                                        | Physician Office<br>Obs = 13,616<br>Groups = 1,593 |
| Qualifying indication<br>(reference: Acute Myocardial Infarct)                      |                                                                                                                                               |                                      |                        |                                                                                                                                                                                                 |                                      |                        | 0.007<br>(-0.002, 0.017)                                                                                                                                                                         | -0.000<br>(-0.008, 0.008)                          |
| Coronary Artery Bypass Graft                                                        | 0.209<br>(0.199, 0.219)<br>‡                                                                                                                  | 0.099<br>(0.086, 0.111)<br>‡         | NA                     | 0.250<br>(0.236, 0.263)<br>‡                                                                                                                                                                    | 0.117<br>(0.099, 0.136)<br>‡         | NA                     | 0.001<br>(-0.010, 0.013)                                                                                                                                                                         | -0.006<br>(-0.015, 0.003)                          |
| Percutaneous Coronary Intervention                                                  | 0.019<br>(0.009, 0.028)<br>‡                                                                                                                  | -0.010<br>(-0.021, 0.002)<br>‡       | NA                     | 0.011<br>(0.151, 0.187)<br>†                                                                                                                                                                    | -0.007<br>(-0.016, 0.001)<br>*       | NA                     | Reference: PCI                                                                                                                                                                                   | Reference: PCI                                     |
| Cardiac Valve Surgery                                                               | 0.150<br>(0.136, 0.164)<br>‡                                                                                                                  | 0.067<br>(0.053, 0.081)<br>‡         | NA                     | 0.169<br>(0.151, 0.187)<br>‡                                                                                                                                                                    | 0.063<br>(0.044, 0.082)<br>‡         | NA                     | 0.014<br>(-0.003, 0.030)<br>*                                                                                                                                                                    | -0.011<br>(-0.022, -0.000)<br>†                    |
| Medicare entitlement status<br>(reference: Aged, no End Stage Renal Disease (ESRD)) |                                                                                                                                               |                                      |                        |                                                                                                                                                                                                 |                                      |                        |                                                                                                                                                                                                  |                                                    |
| Aged with ESRD                                                                      | -0.176<br>(-0.211, -0.141)<br>‡                                                                                                               | -0.094<br>(-0.142, -0.046)<br>‡      | NA                     | -0.152<br>(-0.173, -0.131)<br>‡                                                                                                                                                                 | -0.052<br>(-0.072, -0.031)<br>‡      | NA                     | 0.035<br>(-0.014, 0.085)                                                                                                                                                                         | -0.008<br>(-0.031, 0.015)                          |
| Disabled, no ESRD                                                                   | -0.162<br>(-0.178, -0.147)<br>‡                                                                                                               | -0.083<br>(-0.104, -0.063)<br>‡      | NA                     | -0.141<br>(-0.152, -0.130)<br>‡                                                                                                                                                                 | -0.052<br>(-0.063, -0.041)<br>‡      | NA                     | 0.002<br>(-0.015, 0.019)                                                                                                                                                                         | 0.004<br>(-0.009, 0.016)                           |
| Disabled, ESRD                                                                      | -0.253<br>(-0.293, -0.213)<br>‡                                                                                                               | -0.090<br>(-0.139, -0.042)<br>‡      | NA                     | -0.186<br>(-0.173, -0.131)<br>‡                                                                                                                                                                 | -0.059<br>(-0.077, -0.040)<br>‡      | NA                     | 0.022<br>(-0.039, 0.082)                                                                                                                                                                         | 0.003<br>(-0.032, 0.038)                           |
| ESRD only                                                                           | -0.329<br>(-0.488, -0.170)<br>‡                                                                                                               | Not estimable                        | NA                     | -0.213<br>(-0.259, -0.168)<br>‡                                                                                                                                                                 | Not estimable                        | NA                     | Not estimable                                                                                                                                                                                    | Not estimable                                      |
| Hospital ownership<br>(reference: Non-profit)                                       |                                                                                                                                               |                                      |                        |                                                                                                                                                                                                 |                                      |                        |                                                                                                                                                                                                  |                                                    |
| For-profit                                                                          | -0.001<br>(-0.021, 0.018)                                                                                                                     | -0.012<br>(-0.030, 0.005)            | NA                     | -0.001<br>(-0.021, 0.018)                                                                                                                                                                       | -0.010<br>(-0.025, 0.005)            | NA                     | -0.016<br>(-0.031, -0.001)<br>†                                                                                                                                                                  | 0.022<br>(0.002, 0.042)<br>†                       |

| Independent variables                                 | Effect Modification                                                                                                                           |                                      |                        |                                                                                                                                                                                                 |                                      |                        | Subgroup Analyses                                                                                                                                                                                |                                                    |
|-------------------------------------------------------|-----------------------------------------------------------------------------------------------------------------------------------------------|--------------------------------------|------------------------|-------------------------------------------------------------------------------------------------------------------------------------------------------------------------------------------------|--------------------------------------|------------------------|--------------------------------------------------------------------------------------------------------------------------------------------------------------------------------------------------|----------------------------------------------------|
|                                                       | CR Program Offered<br><i>Defined as hospitals with any CR claim anywhere in 5% Medicare sample</i><br>AME estimates / (95% CI) / significance |                                      |                        | Index Hospitals Matched to CR Programs<br><i>Defined as hospitals where any patients in analytic sample had both an index event &amp; a CR claim</i><br>AME estimates / (95% CI) / significance |                                      |                        | Facility Type Where CR Performed<br><i>In patients who did CR, non-hospital ambulatory facility vs hospitals &amp; physician offices vs hospitals</i><br>AME estimates / (95% CI) / significance |                                                    |
|                                                       | Yes<br>Obs = 58,249<br>Groups = 1,994                                                                                                         | No<br>Obs = 18,426<br>Groups = 1,909 | Interaction<br>p-value | Yes<br>Obs = 57,870<br>Groups = 1,341                                                                                                                                                           | No<br>Obs = 18,803<br>Groups = 2,057 | Interaction<br>p-value | Non-Hospital Ambulatory<br>Obs = 14,399<br>Groups = 1,611                                                                                                                                        | Physician Office<br>Obs = 13,616<br>Groups = 1,593 |
| Non-federal government                                | 0.010<br>(-0.029, 0.010)                                                                                                                      | -0.040<br>(-0.066, -0.014)<br>†      | NA                     | -0.011<br>(-0.031, 0.009)                                                                                                                                                                       | -0.023<br>(-0.043, -0.004)<br>†      | NA                     | 0.018<br>(-0.009, 0.045)                                                                                                                                                                         | -0.017<br>(-0.031, -0.004)<br>†                    |
| Number of beds in 100s                                | -0.003<br>(-0.005, -0.000)<br>†                                                                                                               | 0.004<br>(0.001, 0.007)<br>†         | NA                     | -0.007<br>(-0.009, -0.004)<br>‡                                                                                                                                                                 | 0.005<br>(0.002, 0.009)<br>†         | NA                     | -0.000<br>(-0.003, 0.003)                                                                                                                                                                        | 0.004<br>(0.002, 0.006)<br>‡                       |
| Part of a hospital system                             | -0.009<br>(-0.022, 0.004)                                                                                                                     | 0.018<br>(0.003, 0.033)<br>†         | NA                     | -0.009<br>(-0.023, 0.004)                                                                                                                                                                       | 0.021<br>(0.008, 0.034)<br>†         | NA                     | 0.009<br>(-0.006, 0.023)                                                                                                                                                                         | 0.005<br>(-0.013, 0.022)                           |
| CR offered                                            | NA                                                                                                                                            | NA                                   | NA                     | NA                                                                                                                                                                                              | NA                                   | NA                     | -0.044<br>(-0.066, -0.022)<br>‡                                                                                                                                                                  | -0.087<br>(-0.119, -0.055)<br>‡                    |
| Teaching hospital                                     | 0.020<br>(-0.009, 0.050)                                                                                                                      | 0.009<br>(-0.021, 0.040)             | NA                     | 0.023<br>(-0.005, 0.061)                                                                                                                                                                        | -0.025<br>(-0.006, 0.056)            | NA                     | 0.022<br>(-0.009, 0.053)                                                                                                                                                                         | 0.009<br>(-0.012, 0.030)                           |
| Specialty hospital                                    | 0.048<br>(-0.035, 0.130)                                                                                                                      | 0.041<br>(0.004, 0.079)<br>†         | NA                     | 0.032<br>(-0.062, 0.126)                                                                                                                                                                        | 0.056<br>(0.005, 0.106)<br>†         | NA                     | 0.044<br>(-0.012, 0.100)                                                                                                                                                                         | -0.011<br>(-0.034, 0.012)                          |
| Rural hospital                                        | -0.011<br>(-0.029, 0.007)                                                                                                                     | -0.054<br>(-0.080, -0.029)<br>‡      | NA                     | 0.024<br>(0.004, 0.043)<br>†                                                                                                                                                                    | -0.043<br>(-0.057, -0.029)<br>‡      | NA                     | 0.061<br>(0.034, 0.089)<br>‡                                                                                                                                                                     | 0.010<br>(-0.012, 0.032)                           |
| Census region of index hospital<br>(reference: South) |                                                                                                                                               |                                      |                        |                                                                                                                                                                                                 |                                      |                        |                                                                                                                                                                                                  |                                                    |
| Northeast                                             | -0.013<br>(-0.036, 0.010)                                                                                                                     | -0.012<br>(-0.035, 0.012)            | NA                     | -0.004<br>(-0.025, 0.017)                                                                                                                                                                       | -0.002<br>(-0.021, 0.016)            | NA                     | -0.109<br>(-0.128, -0.091)<br>‡                                                                                                                                                                  | -0.007<br>(-0.027, 0.013)                          |
| Midwest                                               | 0.091<br>(0.074, 0.108)<br>‡                                                                                                                  | 0.052<br>(0.032, 0.073)<br>‡         | NA                     | 0.098<br>(0.079, 0.117)<br>‡                                                                                                                                                                    | 0.038<br>(0.015, 0.062)<br>†         | NA                     | -0.094<br>(-0.115, -0.074)<br>‡                                                                                                                                                                  | -0.009<br>(-0.026, 0.007)                          |
| West                                                  | 0.028<br>(0.008, 0.048)<br>†                                                                                                                  | 0.012<br>(-0.008, 0.032)             | NA                     | 0.016<br>(-0.004, 0.035)                                                                                                                                                                        | 0.016<br>(-0.003, 0.035)<br>*        | NA                     | -0.067<br>(-0.097, -0.037)<br>‡                                                                                                                                                                  | 0.013<br>(-0.008, 0.034)                           |

| Independent variables                                      | Effect Modification                                                                                |                                      |                        |                                                                                                                                                      |                                      |                        | Subgroup Analyses                                                                                                                                     |                                                    |
|------------------------------------------------------------|----------------------------------------------------------------------------------------------------|--------------------------------------|------------------------|------------------------------------------------------------------------------------------------------------------------------------------------------|--------------------------------------|------------------------|-------------------------------------------------------------------------------------------------------------------------------------------------------|----------------------------------------------------|
|                                                            | CR Program Offered<br><i>Defined as hospitals with any CR claim anywhere in 5% Medicare sample</i> |                                      |                        | Index Hospitals Matched to CR Programs<br><i>Defined as hospitals where any patients in analytic sample had both an index event &amp; a CR claim</i> |                                      |                        | Facility Type Where CR Performed<br><i>In patients who did CR, non-hospital ambulatory facility vs hospitals &amp; physician offices vs hospitals</i> |                                                    |
|                                                            | AME estimates / (95% CI) / significance                                                            |                                      |                        | AME estimates / (95% CI) / significance                                                                                                              |                                      |                        | AME estimates / (95% CI) / significance                                                                                                               |                                                    |
|                                                            | Yes<br>Obs = 58,249<br>Groups = 1,994                                                              | No<br>Obs = 18,426<br>Groups = 1,909 | Interaction<br>p-value | Yes<br>Obs = 57,870<br>Groups = 1,341                                                                                                                | No<br>Obs = 18,803<br>Groups = 2,057 | Interaction<br>p-value | Non-Hospital Ambulatory<br>Obs = 14,399<br>Groups = 1,611                                                                                             | Physician Office<br>Obs = 13,616<br>Groups = 1,593 |
| Percent Medicare discharges by hospital                    | -0.001<br>(-0.001, 0.000)<br>*                                                                     | 0.000<br>(-0.001, 0.001)             | NA                     | -0.001<br>(-0.001, 0.000)                                                                                                                            | 0.000<br>(-0.000, 0.001)             | NA                     | 0.001<br>(0.000, 0.002)<br>†                                                                                                                          | 0.000<br>(-0.000, 0.001)                           |
| Medicare Advantage penetration by Hospital Referral Region | -0.000<br>(-0.001, 0.000)                                                                          | 0.000<br>(-0.000, 0.001)             | NA                     | 0.000<br>(-0.000, 0.001)                                                                                                                             | -0.000<br>(-0.001, 0.000)            | NA                     | -0.000<br>(-0.001, 0.001)                                                                                                                             | 0.001<br>(0.001, 0.001)<br>†                       |
| Percent uninsured by county                                | -0.003<br>(-0.005, -0.002)<br>‡                                                                    | -0.003<br>(-0.004, -0.001)<br>‡      | NA                     | -0.004<br>(-0.005, -0.002)<br>‡                                                                                                                      | -0.001<br>(-0.002, 0.000)            | NA                     | -0.003<br>(-0.005, -0.001)<br>‡                                                                                                                       | -0.001<br>(-0.002, 0.000)                          |
| Herfindahl-Hirschman Index by Hospital Referral Region     | 0.089<br>(0.040, 0.139)<br>‡                                                                       | 0.060<br>(-0.002, 0.121)<br>*        | NA                     | 0.072<br>(0.019, 0.125)<br>†                                                                                                                         | 0.061<br>(-0.000, 0.122)<br>*        | NA                     | 0.120<br>(0.072, 0.168)<br>‡                                                                                                                          | 0.007<br>(-0.043, 0.057)                           |

AME=average marginal effects; Obs=number of observations included in regression; CI=confidence interval; Groups=number of hospitals; \*p<0.10; †p<0.05; ‡p<0.01; NS indicates a p-value of >0.05 for interaction terms; Not estimable for “ESRD only” represents insufficient frequencies; NA=Not applicable; Calculated using Robust Standard Errors.

**Table III. Additional Analyses: Episodic Windows, Patient Volume, and Falsification of Payment Implementation Date**

|                                                             | Episodic Window<br>AME estimates / (95% CI) / significance |                                                    | Hospital Volume<br>AME estimates / (95% CI) / significance                               | False Implementation Date<br>AME estimates / (95% CI) / significance  |
|-------------------------------------------------------------|------------------------------------------------------------|----------------------------------------------------|------------------------------------------------------------------------------------------|-----------------------------------------------------------------------|
| <b>Independent variables</b>                                | <b>3 months</b><br>Obs = 76,692<br>Groups = 3,399          | <b>12 months</b><br>Obs = 76,692<br>Groups = 3,399 | <b>Include hospitals with &gt;12 Patients / Period</b><br>Obs = 69,495<br>Groups = 1,390 | <b>Policy date of 23 March 2010</b><br>Obs = 76,122<br>Groups = 3,384 |
| Pre-period slope (monthly)                                  | 0.001<br>(0.000, 0.002)<br>†                               | 0.001<br>(0.000, 0.001)<br>†                       | 0.001<br>(0.000, 0.002)<br>†                                                             | 0.000<br>(-0.001, 0.002)                                              |
| Implementation of Payment Increase (level change)           | 0.001<br>(-0.010, 0.013)                                   | 0.007<br>(-0.006, 0.019)                           | 0.004<br>(-0.010, 0.017)                                                                 | 0.009<br>(-0.009, 0.028)                                              |
| Post-period slope change (monthly)                          | -0.001<br>(-0.002, -0.00)<br>†                             | -0.001<br>(-0.002, -0.000)<br>†                    | -0.001<br>(-0.002, -0.000)<br>†                                                          | -0.000<br>(-0.002, 0.002)                                             |
| Age in year of event, in decades                            | -0.049<br>(-0.053, -0.045)<br>‡                            | -0.056<br>(-0.060, -0.051)<br>‡                    | -0.051<br>(-0.055, -0.046)<br>‡                                                          | -0.050<br>(-0.054, -0.046)<br>‡                                       |
| Female                                                      | -0.026<br>(-0.032, -0.021)<br>‡                            | -0.025<br>(-0.031, -0.020)<br>‡                    | -0.028<br>(-0.034, -0.022)<br>‡                                                          | -0.026<br>(-0.031, -0.020)<br>‡                                       |
| Race (reference: white)                                     |                                                            |                                                    |                                                                                          |                                                                       |
| Black                                                       | -0.040<br>(-0.050, -0.029)<br>‡                            | -0.042<br>(-0.053, -0.031)<br>‡                    | -0.044<br>(-0.056, -0.032)<br>‡                                                          | -0.038<br>(-0.048, -0.027)<br>‡                                       |
| Other                                                       | -0.053<br>(-0.066, -0.041)<br>‡                            | -0.065<br>(-0.079, -0.052)<br>‡                    | -0.058<br>(-0.073, -0.044)<br>‡                                                          | -0.056<br>(-0.069, -0.043)<br>‡                                       |
| Charlson Comorbidity Index in month of event                | -0.014<br>(-0.015, -0.013)<br>‡                            | -0.013<br>(-0.014, -0.012)<br>‡                    | -0.015<br>(-0.016, -0.014)<br>‡                                                          | -0.014<br>(-0.015, -0.013)<br>‡                                       |
| Qualifying indication (reference: Acute Myocardial Infarct) |                                                            |                                                    |                                                                                          |                                                                       |
| Coronary Artery Bypass Graft                                | 0.209<br>(0.197, 0.221)<br>‡                               | 0.241<br>(0.230, 0.253)<br>‡                       | 0.231<br>(0.219, 0.243)<br>‡                                                             | 0.227<br>(0.216, 0.238)<br>‡                                          |
| Percutaneous Coronary Intervention                          | 0.014<br>(0.007, 0.021)<br>‡                               | 0.014<br>(0.007, 0.022)<br>‡                       | 0.008<br>(-0.000, 0.016)<br>‡                                                            | 0.014<br>(0.007, 0.021)<br>‡                                          |
| Cardiac Valve Surgery                                       | 0.135<br>(0.120, 0.149)<br>‡                               | 0.164<br>(0.149, 0.179)<br>‡                       | 0.153<br>(0.138, 0.169)<br>‡                                                             | 0.151<br>(0.136, 0.167)<br>‡                                          |

|                                                                                        | <b>Episodic Window</b>                            |                                                    | <b>Hospital Volume</b>                                                                   | <b>False Implementation Date</b>                                      |
|----------------------------------------------------------------------------------------|---------------------------------------------------|----------------------------------------------------|------------------------------------------------------------------------------------------|-----------------------------------------------------------------------|
|                                                                                        | AME estimates / (95% CI) / significance           |                                                    | AME estimates / (95% CI) / significance                                                  | AME estimates / (95% CI) / significance                               |
| <b>Independent variables</b>                                                           | <b>3 months</b><br>Obs = 76,692<br>Groups = 3,399 | <b>12 months</b><br>Obs = 76,692<br>Groups = 3,399 | <b>Include hospitals with &gt;12 Patients / Period</b><br>Obs = 69,495<br>Groups = 1,390 | <b>Policy date of 23 March 2010</b><br>Obs = 76,122<br>Groups = 3,384 |
| Medicare entitlement status<br>(reference: Aged, no end-stage renal disease<br>(ESRD)) |                                                   |                                                    |                                                                                          |                                                                       |
| Aged with ESRD                                                                         | -0.121<br>(-0.136, -0.105)<br>‡                   | -0.125<br>(-0.142, -0.108)<br>‡                    | -0.136<br>(-0.153, -0.117)<br>‡                                                          | -0.126<br>(-0.143, -0.109)<br>‡                                       |
| Disabled, no ESRD                                                                      | -0.111<br>(-0.119, -0.103)<br>‡                   | -0.123<br>(-0.132, -0.114)<br>‡                    | -0.123<br>(-0.153, -0.113)<br>‡                                                          | -0.118<br>(-0.143, -0.110)<br>‡                                       |
| Disabled, ESRD                                                                         | -0.144<br>(-0.158, -0.130)<br>‡                   | -0.158<br>(-0.174, -0.143)<br>‡                    | -0.160<br>(-0.176, -0.144)<br>‡                                                          | -0.149<br>(-0.163, -0.134)<br>‡                                       |
| ESRD only                                                                              | -0.164<br>(-0.199, -0.129)<br>‡                   | -0.198<br>(-0.231, -0.166)<br>‡                    | -0.183<br>(-0.225, -0.141)<br>‡                                                          | -0.168<br>(-0.205, -0.130)<br>‡                                       |
| Hospital ownership<br>(reference: Non-profit)                                          |                                                   |                                                    |                                                                                          |                                                                       |
| For-profit                                                                             | -0.011<br>(-0.025, 0.004)                         | -0.012<br>(-0.027, 0.002)                          | -0.014<br>(-0.031, 0.003)                                                                | -0.010<br>(-0.025, 0.005)                                             |
| Non-federal government                                                                 | -0.019<br>(-0.034, -0.004)<br>†                   | -0.018<br>(-0.034, -0.002)<br>†                    | -0.013<br>(-0.032, 0.005)                                                                | -0.013<br>(-0.029, 0.002)<br>*                                        |
| Number of beds in 100s                                                                 | -0.000<br>(-0.002, 0.002)                         | 0.000<br>(-0.002, 0.002)                           | -0.002<br>(-0.005, -0.000)<br>†                                                          | -0.000<br>(-0.002, 0.002)                                             |
| Part of a hospital system                                                              | -0.003<br>(-0.014, 0.007)                         | -0.004<br>(-0.016, 0.007)                          | -0.007<br>(-0.019, 0.006)                                                                | -0.001<br>(-0.012, 0.009)                                             |
| CR offered                                                                             | 0.101<br>(0.091, 0.111)<br>‡                      | 0.110<br>(0.100, 0.121)<br>‡                       | 0.093<br>(0.081, 0.106)<br>‡                                                             | 0.104<br>(0.094, 0.114)<br>‡                                          |
| Teaching hospital                                                                      | 0.019<br>(-0.006, 0.044)                          | 0.015<br>(-0.010, 0.040)                           | 0.016<br>(-0.011, 0.044)                                                                 | 0.015<br>(-0.010, 0.039)                                              |



|                                                            | <b>Episodic Window</b>                            |                                                    | <b>Hospital Volume</b>                                                                   | <b>False Implementation Date</b>                                      |
|------------------------------------------------------------|---------------------------------------------------|----------------------------------------------------|------------------------------------------------------------------------------------------|-----------------------------------------------------------------------|
|                                                            | AME estimates / (95% CI) / significance           |                                                    | AME estimates / (95% CI) / significance                                                  | AME estimates / (95% CI) / significance                               |
| <b>Independent variables</b>                               | <b>3 months</b><br>Obs = 76,692<br>Groups = 3,399 | <b>12 months</b><br>Obs = 76,692<br>Groups = 3,399 | <b>Include hospitals with &gt;12 Patients / Period</b><br>Obs = 69,495<br>Groups = 1,390 | <b>Policy date of 23 March 2010</b><br>Obs = 76,122<br>Groups = 3,384 |
| Specialty hospital                                         | 0.034<br>(-0.022, 0.090)                          | 0.036<br>(-0.022, 0.094)                           | -0.001<br>(-0.057, 0.055)                                                                | 0.042<br>(-0.015, 0.099)                                              |
| Rural hospital                                             | -0.017<br>(-0.031, -0.003)<br>†                   | -0.023<br>(-0.038, -0.009)<br>†                    | -0.002<br>(-0.020, 0.017)                                                                | -0.020<br>(-0.034, -0.006)<br>†                                       |
| Census region of index hospital (reference: South)         |                                                   |                                                    |                                                                                          |                                                                       |
| Northeast                                                  | -0.016<br>(-0.032, -0.000)<br>†                   | -0.012<br>(-0.029, 0.005)<br>†                     | -0.011<br>(-0.30 0.009)                                                                  | -0.007<br>(-0.024, 0.009)                                             |
| Midwest                                                    | 0.084<br>(0.068, 0.099)<br>‡                      | 0.089<br>(0.073, 0.105)<br>‡                       | 0.096<br>(0.077, 0.114)<br>‡                                                             | 0.090<br>(0.074, 0.105)<br>‡                                          |
| West                                                       | 0.022<br>(0.006, 0.037)<br>†                      | 0.028<br>(0.012, 0.044)<br>‡                       | 0.019<br>(0.001, 0.037)<br>†                                                             | 0.022<br>(0.007, 0.038)<br>†                                          |
| Percent Medicare discharges by hospital                    | -0.000<br>(-0.001, 0.00)                          | -0.000<br>(-0.001, 0.000)                          | 0.000<br>(-0.001, 0.000)                                                                 | -0.000<br>(-0.001, 0.001)                                             |
| Medicare Advantage penetration by Hospital Referral Region | -0.000<br>(-0.001, 0.000)                         | -0.000<br>(-0.001, 0.000)                          | 0.000<br>(-0.000, 0.001)                                                                 | -0.000<br>(-0.000, 0.001)                                             |
| Percent uninsured by county                                | -0.003<br>(-0.005, -0.002)<br>‡                   | -0.004<br>(-0.005, -0.002)<br>‡                    | -0.004<br>(-0.005, -0.002)<br>‡                                                          | -0.003<br>(-0.005, -0.002)<br>‡                                       |
| Herfindahl-Hirschman Index by Hospital Referral Region     | 0.092<br>(0.051, 0.133)<br>‡                      | 0.083<br>(0.040, 0.126)<br>‡                       | 0.099<br>(0.051, 0.167)<br>‡                                                             | 0.081<br>(0.040, 0.122)<br>‡                                          |

AME=average marginal effects; CI=confidence interval; Obs=number of observations included in regression; Groups=number of hospitals; \*p<0.10; †p<0.05; ‡p<0.01; NS indicates a p-value of >0.05 for interaction terms; Not estimable for “ESRD only” represents insufficient frequencies; NA=Not applicable; Calculated using Robust Standard Errors.

**Table IV. Time Window Sensitivity Analyses**

| Analysis                         | Time Window           | Pre-Period Slope          | Level Change                       | Post-Period Slope Change    |
|----------------------------------|-----------------------|---------------------------|------------------------------------|-----------------------------|
|                                  |                       |                           | Average Marginal Effects (95 % CI) |                             |
| Original                         | 1/1/2009 – 5/31/2012  | 0.0009 (0.0003, 0.0015)†  | 0.0029 (-0.0092, 0.0151)           | -0.0011 (-0.0022, -0.0001)† |
| Short Pre-Period                 | 2/1/2009 – 5/31/2012  | 0.0009 (0.0003, 0.0016)†  | 0.0025 (-0.0096, 0.0147)           | -0.0011 (-0.0022, -0.0004)† |
|                                  | 3/1/2009 – 5/31/2012  | 0.0008 (0.0001, 0.0015)†  | 0.0035 (-0.0090, 0.0159)           | -0.0010 (-0.0022, 0.0001)*  |
|                                  | 4/1/2009 – 5/31/2012  | 0.0009 (0.0001, 0.0016)†  | 0.0031 (-0.0096, 0.0158)           | -0.0010 (-0.0022, 0.0001)*  |
|                                  | 5/1/2009 – 5/31/2012  | 0.0009 (0.0000, 0.0018)†  | 0.0026 (-0.0106, 0.0158)           | -0.0011 (-0.0023, 0.0002)*  |
|                                  | 6/1/2009 – 5/31/2012  | 0.0009 (-0.0000, 0.0019)* | 0.0023 (-0.0118, 0.0163)           | -0.0011 (-0.0024, 0.0002)*  |
|                                  | 7/1/2009 – 5/31/2012  | 0.0009 (-0.0002, 0.0021)  | 0.0022 (-0.0126, 0.0171)           | -0.0011 (-0.0026, 0.0004)   |
|                                  | 8/1/2009 – 5/31/2012  | 0.0017 (0.0004, 0.0031)†  | -0.0051 (-0.0215, 0.0113)          | -0.0019 (-0.0036, -0.0003)† |
|                                  | 9/1/2009 – 5/31/2012  | 0.0014 (-0.0004, 0.0031)  | -0.0018 (-0.0203, 0.0177)          | -0.0016 (-0.0037, 0.0005)   |
| Short Post-Period                | 1/1/2009 – 4/30/2012  | 0.0009 (0.0003, 0.0015)†  | 0.0030 (-0.0093, 0.0152)           | -0.0011 (-0.0022, -0.0003)† |
|                                  | 1/1/2009 – 3/31/2012  | 0.0009 (0.0003, 0.0015)†  | 0.0010 (-0.0113, 0.0133)           | -0.0008 (-0.0019, 0.0004)   |
|                                  | 1/1/2009 – 2/29/2012  | 0.0009 (0.0003, 0.0015)†  | 0.0008 (-0.0116, 0.0132)           | -0.0008 (-0.0021, 0.0005)   |
|                                  | 1/1/2009 – 1/31/2012  | 0.0009 (0.0003, 0.0015)†  | 0.0002 (-0.0126, 0.0130)           | -0.0006 (-0.0020, 0.0008)   |
|                                  | 1/1/2009 – 12/31/2011 | 0.0010 (0.0004, 0.0017)‡  | -0.0064 (-0.0206, 0.0078)          | 0.0005 (-0.0012, 0.0022)    |
| Both Pre- and Post-Periods Short | 2/1/2009 – 4/30/2012  | 0.0009 (0.0003, 0.0016)†  | 0.0025 (-0.0097, 0.0148)           | -0.0011 (-0.0023, 0.0000)*  |
|                                  | 3/1/2009 – 3/31/2012  | 0.0009 (0.0001, 0.0016)†  | 0.0014 (-0.0112, 0.0141)           | -0.0007 (-0.0019, 0.0006)   |
|                                  | 4/1/2009 – 4/30/2012  | 0.0009 (0.0001, 0.0016)†  | 0.0031 (-0.0097, 0.0159)           | -0.0010 (-0.0023, 0.0002)   |
|                                  | 4/1/2009 – 3/31/2012  | 0.0009 (0.0001, 0.0017)†  | 0.0007 (-0.0122, 0.0137)           | -0.0007 (-0.0020, 0.0005)   |
|                                  | 5/1/2009 – 4/30/2012  | 0.0009 (0.0000, 0.0017)†  | 0.0027 (-0.0107, 0.0160)           | -0.0011 (-0.0023, 0.0002)   |
|                                  | 6/1/2009 – 4/30/2012  | 0.0009 (-0.0000, 0.0019)* | 0.0025 (-0.0115, 0.0166)           | -0.0011 (-0.0000, 0.0003)   |

\*p<0.10; †p<0.05; ‡p<0.01
